# Supplementary material
Source: Springer Nature journal article supplement (https://www.springermedizin.de/resource/supplementary/13256_2011_1724_MOESM8_ESM.pdf/9648294)

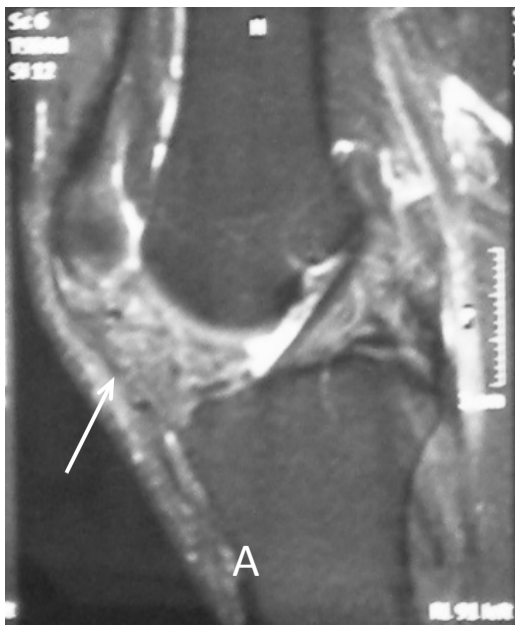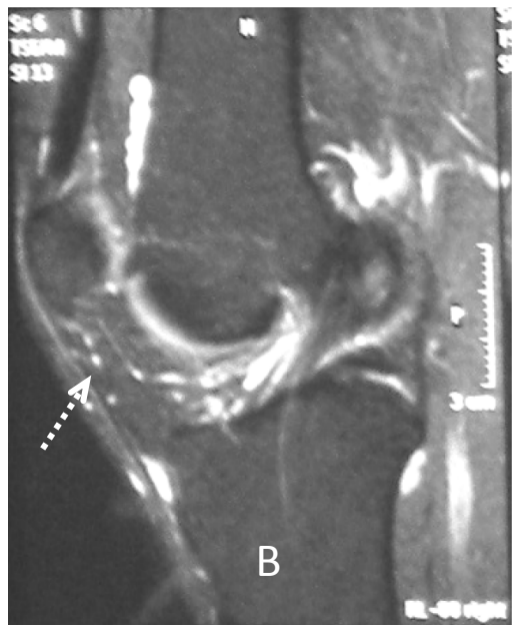

Supplement: MOESM8 [file 9648294]
